# Supplementary material for: Association of gut microbiota with idiopathic membranous nephropathy
Source: BMC Nephrol. 2022 Apr 30;23:164. doi: 10.1186/s12882-022-02797-5 (PMC9055735; doi:10.1186/s12882-022-02797-5)
Supplement: Supplementary file 1 — Additional file 1: Supplemental Table 1. Baseline characteristics of participants. [file 12882_2022_2797_MOESM1_ESM.xlsx]

## Sheet: Sheet1
Supplemental Table 1: Baseline characteristics of participants
#SampleID	Gender	Age (years)	BMI	eGFR (mL/min/1.73 m2)	TP (g/L)	Serum albumin (g/L)	TC (mmol/L)	TG (mmol/L)	Urinary protein excretion (g/L)	HDL-C (mmol/L)	LDL-C (mmol/L)	SBP (mmHg)	DBP (mmHg)	UA (umol/L)	ALT (U/L)	AST (U/L)	BUN (mmol/L)	LDH (U/L)
IMN1	M	55	23.8	71.8	51.5	24.4	9	1.5	1.08	1.27	6.49	140	100	255.8	25	24	5.29	189
IMN2	M	57	23.7	59.86	61.5	17.6	8.78	1.82	2	1.27	6.49	167	115	245.9	4	17	8.4	145
IMN3	M	52	23.6	95.76	37.8	14.9	9.01	4.45	11.3	1.26	4.9	140	90	298.9	17	40	6.4	216
IMN4	M	66	20.7	63.41	47.6	21.7	9.32	3.02	4.3	1.26	4.9	165	99	426.7	9	17	4.35	225
IMN5	M	40	24.9	88.15	53.7	31.7	9.25	17.89	3	1.26	4.9	150	105	654	10	12	5.53	186
IMN6	M	51	23.9	102.67	70	41.3	8.5	2	5	1.26	4.9	119	89	339.4	32	18	2.76	212
IMN7	M	64	23.4	60.79	43.9	24.4	8.82	2.53	5.3	0.9	6.8	136	93	373.7	21	17	7.81	223
IMN8	M	56	22.5	97.48	57.8	25.6	8.67	2.23	4.9	1.42	5.3	135	80	411.1	7	21	5.45	201
IMN9	F	43	20	115.37	55.4	28.2	8.56	1.94	3.6	1.91	5.45	128	92	303.9	4	18	5.69	159
IMN10	M	64	21.3	101	54.2	29.7	7.92	2.23	2.7	1.08	5.53	119	80	364.3	10	15	5.93	160
IMN11	F	54	19.8	94.31	60	33	4.84	1.21	1.8	1.78	2.62	134	81	251.6	14	19	3.48	210
IMN12	M	44	22.3	99.8	53.2	21.7	7.34	6.38	6.8	1.19	4.14	131	92	585.4	8	17	5.72	224
IMN13	M	42	23.1	107	45.9	19.6	7.93	1.48	2.9	1.25	5.51	135	98	440	14	22	4.48	167
IMN14	M	34	21	103.99	51.2	25.8	8.61	1.74	1.5	1.22	6.73	130	80	438.6	16	24	4.47	223
IMN15	F	63	18.7	60	43.8	21.2	5	1.5	6.6	1.26	4.9	175	82	217.2	11	15	4.85	236
IMN16	M	73	23.5	39.2	49	24.4	8.29	2.08	2	1.42	6.72	113	88	292.7	5	17	10.15	268
IMN17	M	42	22.1	90.44	52.3	26.4	7.5	2	4.2	1.26	4.9	130	92	591.4	25	14	4.46	201
IMN18	M	51	21.3	78.84	51.9	17.5	10.67	1.38	1.5	1.49	8.16	142	96	349.4	9	24	10.79	293
IMN19	M	45	21.4	94.89	55	24	7.13	2.71	1.2	1.19	4.97	138	88	432.3	14	27	5.54	242
IMN20	F	47	20.8	80.48	54.5	29.6	7.03	3.48	1.5	1.03	3.94	173	102	293.1	11	12	3.61	277
IMN21	F	35	20.2	111.99	39.9	31.5	6.11	3.52	1.5	1.03	3.76	122	98	420.7	8	19	3.49	158
IMN22	M	48	22.4	130.86	52.1	24.2	11.1	2.2	3.7	1.98	7.69	135	85	267.7	12	30	4.39	312
IMN23	M	54	23.1	65.94	53.7	27.6	5.29	7.58	1.4	0.82	1.96	129	69	414.9	7	17	7.31	271
IMN24	F	55	19.8	109.95	42.4	20.5	7.23	6.03	5	0.85	3.18	139	78	276.4	11	17	6.38	198
IMN25	M	53	22.1	97.96	39.9	19.7	7	2	1.8	1.26	4.9	147	102	286.7	9	16	4.16	246
IMN26	M	58	21	94.58	52.2	33.8	4.9	1.75	1	1.03	3.33	147	89	441.6	12	24	5.35	314
IMN27	F	26	19.5	124.21	59	26	7.1	3.47	7.3	1.01	4.35	131	86	380.6	13	20	3.34	258
IMN28	M	56	22.8	91.73	74.9	36.5	6.17	6.34	5.4	0.95	2.15	102	72	559	16	19	11.16	194
IMN29	F	57	21.3	70.51	67.4	42.7	5.42	0.9	1.2	1.83	3.02	131	88	236.4	10	16	3.29	208
IMN30	M	54	22.9	60.11	41	19	14.08	6.12	6.6	1.06	5.32	160	110	361.9	179	152	10.38	266
HC1	F	53	21.3
HC2	F	56	21.2
HC3	M	57	23
HC4	M	42	23.9
HC5	F	22	19
HC6	F	48	19
HC7	F	60	21.6
HC8	M	34	22.6
HC9	M	46	21.9
HC10	M	40	22
HC11	M	56	21.5
HC12	M	23	22.1
HC13	M	23	20
HC14	F	32	19.6
HC15	M	67	21.2
HC16	F	70	20.1
HC17	F	41	19.9
HC18	F	29	19.9
HC19	F	41	20.6
HC20	M	48	23.2
HC21	M	36	22.8
HC22	F	47	20.8
HC23	F	52	21.1
HC24	M	57	21.9
HC25	F	51	20
HC26	F	57	20.2
HC27	M	30	21.7
HC28	M	28	21
HC29	M	57	23.7
HC30	F	53	21.2
