# Supplementary material for: Association of gut microbiota with idiopathic membranous nephropathy
Source: BMC Nephrol. 2022 Apr 30;23:164. doi: 10.1186/s12882-022-02797-5 (PMC9055735; doi:10.1186/s12882-022-02797-5)
Supplement: Supplementary file 2 — Additional file 2: Supplemental Table 2. α-Diversity was assessed with 4 different diversity analysis methods. [file 12882_2022_2797_MOESM2_ESM.xlsx]

## Sheet: 多样性指数表
Supplemental Table 2：α-diversity analysis
Sample	Sobs	Shannon	Simpson	Chao
IMN1	177	2.97571	0.089576	210.158
HC1	275	3.20912	0.132386	309.138
IMN2	209	2.22871	0.300868	241.217
HC2	277	3.67072	0.043592	352.115
IMN3	43	0.112274	0.965084	118.6
HC3	104	1.69443	0.387268	160.1
IMN4	189	2.40163	0.20113	265.562
HC4	281	2.33796	0.353661	319.278
IMN5	125	2.65614	0.11677	139.286
HC5	326	3.54756	0.056039	395.081
IMN6	179	3.1129	0.075928	228.286
HC6	250	3.38997	0.079399	276.64
IMN7	50	0.684405	0.74201	61.6667
HC7	287	3.88467	0.03852	324.658
IMN8	266	3.17875	0.107528	383.435
HC8	324	3.95567	0.039059	394.037
IMN9	235	3.65112	0.055194	280.556
HC9	327	3.64882	0.072242	390.103
IMN10	317	3.47769	0.073572	379.636
HC10	328	3.96532	0.043702	375
IMN11	313	3.61092	0.058874	379.5
HC11	287	3.42726	0.066884	359.333
IMN12	286	3.60822	0.052479	325.783
HC12	174	3.59465	0.063208	185.176
IMN13	197	2.97877	0.11077	213
HC13	268	3.67322	0.044684	343.64
IMN14	372	4.00622	0.038186	454.833
HC14	256	2.73118	0.209053	321.1
IMN15	201	3.01024	0.090346	246.048
HC15	245	3.63371	0.052906	268.25
IMN16	351	3.96559	0.042538	432.375
HC16	330	3.9062	0.048946	361.364
IMN17	361	3.97406	0.03821	402.129
HC17	297	3.58987	0.050106	397.625
IMN18	308	3.12234	0.152967	345.5
HC18	234	2.62242	0.194226	309.316
IMN19	244	3.05298	0.111004	293.043
HC19	207	1.75902	0.315091	226.528
IMN20	249	3.33289	0.070849	284.814
HC20	364	3.9056	0.039127	427.718
IMN21	141	1.38474	0.546073	278.8
HC21	289	3.39779	0.080871	336.517
IMN22	156	2.64283	0.144109	184.636
HC22	332	4.06109	0.033326	378.667
IMN23	247	3.57407	0.053337	286.808
HC23	222	2.81725	0.154874	263.577
IMN24	265	3.38701	0.092102	296.538
HC24	383	4.16176	0.02947	439.95
IMN25	251	3.13549	0.090799	294.966
HC25	304	3.38537	0.101085	341.625
IMN26	236	3.04407	0.114132	257.25
HC26	166	3.2611	0.063226	193.273
IMN27	221	3.2132	0.084078	254.214
HC27	333	4.03442	0.041846	409.957
IMN28	328	3.76445	0.052869	365.243
HC28	367	4.07261	0.036964	411.386
IMN29	157	2.34864	0.171614	204.833
HC29	233	3.46174	0.068434	278.15
IMN30	374	3.66779	0.052793	451.027
HC30	361	3.76321	0.050523	412.692
